# Supplementary material for: The Role of Pyoluteorin from Pseudomonas protegens Pf-5 in Suppressing the Growth and Pathogenicity of Pantoea ananatis on Maize
Source: MDPI journal article supplement (doi:10.3390/ijms23126431), 2022-06-09
Supplement: s1 [file s1]

Table S1 Strains and plasmids used in this study

| Strains/Plasmids           | Characteristics                                                                                                                                                                                                                                            | Source           |
|----------------------------|------------------------------------------------------------------------------------------------------------------------------------------------------------------------------------------------------------------------------------------------------------|------------------|
| <b><i>P. protegens</i></b> |                                                                                                                                                                                                                                                            |                  |
| Pf-5                       | Wild type, Ap <sup>r</sup>                                                                                                                                                                                                                                 | [19]             |
| $\Delta ofaA$              | Pf-5 deleted the <i>ofaA</i> gene, Ap <sup>r</sup>                                                                                                                                                                                                         | This study       |
| $\Delta pltB$              | Pf-5 deleted the <i>pltB</i> gene, Ap <sup>r</sup>                                                                                                                                                                                                         | This study       |
| $\Delta phlA$              | Pf-5 deleted the <i>phlA</i> gene, Ap <sup>r</sup>                                                                                                                                                                                                         | This study       |
| $\Delta prnA$              | Pf-5 deleted the <i>prnA</i> gene, Ap <sup>r</sup>                                                                                                                                                                                                         | This study       |
| $\Delta rzxB$              | Pf-5 deleted the <i>rzxB</i> gene, Ap <sup>r</sup>                                                                                                                                                                                                         | This study       |
| $\Delta hcnABC$            | Pf-5 deleted the <i>hcnABC</i> gene, Ap <sup>r</sup>                                                                                                                                                                                                       | This study       |
| $\Delta pFL4656$           | Pf-5 deleted the <i>pFL4656</i> gene, Ap <sup>r</sup>                                                                                                                                                                                                      | This study       |
| <b><i>P. ananatis</i></b>  |                                                                                                                                                                                                                                                            |                  |
| DZ-12                      | Wild-type                                                                                                                                                                                                                                                  | [2]              |
| DZ-12( <i>gfp</i> )        | Wild-type transformed with pBBR-GFP, Gen <sup>R</sup>                                                                                                                                                                                                      | [2]              |
| <b><i>E. coli</i></b>      |                                                                                                                                                                                                                                                            |                  |
| Top10                      | <i>mcrA</i> $\Delta$ ( <i>mrr-hsdRMS-mcrBC</i> ) $\phi$ 80 <i>lacZ</i> $\Delta$ M15 $\Delta$ <i>lacX74</i> <i>recA1</i><br><i>araD139</i> $\Delta$ ( <i>ara-leu</i> )7697 <i>galU</i> <i>galK</i> <i>rpsL</i> (Str <sup>r</sup> ) <i>endA1</i> <i>nupG</i> | TaKaRa Company   |
| <b>Plasmids</b>            |                                                                                                                                                                                                                                                            |                  |
| pK18mobsacB                | Broad-host-range gene replacement vector; <i>sacB</i> , Km <sup>r</sup>                                                                                                                                                                                    | Laboratory stock |
| pRK-2013                   | Helper plasmid for triparental mating; Km <sup>r</sup>                                                                                                                                                                                                     | Laboratory stock |
| pK18- <i>ofaA</i>          | pK18mobsacB with <i>Sal</i> I- <i>Hind</i> III insert of 330 bp and 308 bp segments flanking <i>ofaA</i> , Km <sup>r</sup>                                                                                                                                 | This study       |
| pK18- <i>pltB</i>          | pK18mobsacB with <i>Xba</i> I- <i>Hind</i> III insert of 770 bp and 770 bp segments flanking <i>pltB</i> , Km <sup>r</sup>                                                                                                                                 | This study       |
| pK18- <i>phlA</i>          | pK18mobsacB with <i>Xba</i> I- <i>Hind</i> III insert of 542 bp and 512 bp segments flanking <i>phlA</i> , Km <sup>r</sup>                                                                                                                                 | This study       |
| pK18- <i>prnA</i>          | pK18mobsacB with <i>Xba</i> I- <i>Hind</i> III insert of 770 bp and 770 bp segments flanking <i>prnA</i> , Km <sup>r</sup>                                                                                                                                 | This study       |
| pK18- <i>rzxB</i>          | pK18mobsacB with <i>Xba</i> I- <i>Hind</i> III insert of 740 bp and 733 bp segments flanking <i>rzxB</i> , Km <sup>r</sup>                                                                                                                                 | This study       |
| pK18- <i>hcnABC</i>        | pK18mobsacB with <i>Xba</i> I- <i>Hind</i> III insert of 452 bp and 518 bp segments flanking <i>hcnABC</i> , Km <sup>r</sup>                                                                                                                               | This study       |
| pK18- <i>pFL4656</i>       | pK18mobsacB with <i>Xba</i> I- <i>Hind</i> III insert of 566 bp and 529 bp segments flanking <i>pFL4656</i> , Km <sup>r</sup>                                                                                                                              | This study       |

Table S2 DNA primers used in this study

| Primer                          | Primer sequence (5'→3')                            |
|---------------------------------|----------------------------------------------------|
| <b>For mutants construction</b> |                                                    |
| <i>ofa</i> - F1                 | ACGCGTCGACTGGGTCAAGCCCTTGCGA ( <i>Sal</i> I)       |
| <i>ofaA</i> -R1                 | TGACATGGGAAGCCGGGAGGCGGAAAAATGCGTCAT               |
| <i>ofaA</i> -F2                 | ATGACGCATTTTTCCGCCTCCCGGCTTCCCATGTCA               |
| <i>ofaA</i> -R2                 | CCCAAGCTTAGCAGGTCCTCCTGTTCC ( <i>Hind</i> III)     |
| <i>ofaA</i> -outF               | AAATCGCTGATCGATGCGC                                |
| <i>ofaA</i> -outR               | TCCGGGGTGATCCTGAAGG                                |
| <i>pltB</i> -F1                 | CTAGTCTAGATCGACTACATCTTCATTCACT ( <i>Xba</i> I)    |
| <i>pltB</i> -R1                 | ATCAGCTCGGCCCCGTGACAATCCACTCCCGATGATTGCAA          |
| <i>pltB</i> -F2                 | TTGCAATCATCGGGAGTGGATTGTCACGGGCCGAGCTGAT           |
| <i>pltB</i> -R2                 | CCCAAGCTTGTGCAGGGCCACCAGGGAT ( <i>Hind</i> III)    |
| <i>pltB</i> -outF               | AAGGCCAAGATGGTGGTGG                                |
| <i>pltB</i> -outR               | CGCTTGAGCGCAAGGATCA                                |
| <i>phlA</i> -F1                 | CTAGTCTAGAGGAAGTGAGAATGGCTTTA ( <i>Xba</i> I)      |
| <i>phlA</i> -R1                 | CTTGCGTAGACAGGCGTAAGTTCATTTTCCTCTTGATTCC           |
| <i>phlA</i> -F2                 | GGAATCAAGAGGAAAATGAACTTACGCCTGTCTACGCAAG           |
| <i>phlA</i> -R2                 | CCCAAGCTTATAGCCGAACCTCTGGAAG ( <i>Hind</i> III)    |
| <i>phlA</i> -outF               | TAAACCTCGGCGATCAACG                                |
| <i>phlA</i> -outR               | CGCTGTTCTTCAACACTTCC                               |
| <i>prnA</i> -F1                 | CTAGTCTAGACTGGCCCATGACGGCCCG ( <i>Xba</i> I)       |
| <i>prnA</i> -R1                 | TTCCTGAGCCGCGAGCGTGCGGTGCCGCCGCCACG                |
| <i>prnA</i> -F2                 | CGTGGGCGGCGGCACCGCACGCTCGCGGCTCAGGAA               |
| <i>prnA</i> -R2                 | CCCAAGCTTTTCTCGATAAGCTGGGTCGTCC ( <i>Hind</i> III) |
| <i>prnA</i> -outF               | GCTTCGTGGCCATGGAAAT                                |
| <i>prnA</i> -outR               | CGCAGCAGGACCTTGAAGA                                |
| <i>rxzB</i> - F1                | CTAGTCTAGACGTTGTCTTGCAGCAAGCG ( <i>Xba</i> I)      |
| <i>rxzB</i> -R1                 | GCGCTGGTGAAGGACATCAGAGCTCGCGCAGGTAGTGG             |
| <i>rxzB</i> -F2                 | CCACTACCTGCGCGAGCTCTGATGTCCTTACCAGCGC              |
| <i>rxzB</i> -R2                 | CCCAAGCTTCGGACAAACCTTCATCCCACT ( <i>Hind</i> III)  |
| <i>rxzB</i> -outF               | TTGCCATTGGCAATTTTTCTG                              |
| <i>rxzB</i> -outR               | CTCGATCAGCACCTGATTG                                |
| <i>hcnABC</i> -F1               | CTAGTCTAGAGCCGTGGTCTGGCTTGAAA ( <i>Xba</i> I)      |

---

|                      |                                                  |
|----------------------|--------------------------------------------------|
| <i>hcnABC</i> -R1    | GCCAGCGCCTACAGAGCGGTGTGGGTTCATCCGTGAAAA          |
| <i>hcnABC</i> -F2    | TTTTCACGGATGAACCCACACCGCTCTGTAGGCGCTGGC          |
| <i>hcnABC</i> -R2    | CCCAAGCTTCATCGACTACCTGGAAACCC ( <i>Hind</i> III) |
| <i>hcnABC</i> -outF  | TGGAAGAAGCCAAGCAGGC                              |
| <i>hcnABC</i> -outR  | CTGCCCTTCGAGCATCACT                              |
| <i>pFL4656</i> -F1   | CTAGTCTAGACCATTTTTTCAGCAACCCGCA ( <i>Xba</i> I)  |
| <i>pFL4656</i> -R1   | GGCGTTCATGGAGGTTTCTGATATCCCTGCCTTGTTGTT          |
| <i>pFL4656</i> -F2   | AACAACAAGGCAGGGATATCAGAAACCTCCATGAACGCC          |
| <i>pFL4656</i> -R2   | CCCAAGCTTAGGTCTTCTGGATGTGCTCC ( <i>Hind</i> III) |
| <i>pFL4656</i> -outF | CTGATCATCGAGCCGATCCA                             |
| <i>pFL4656</i> -outR | TACAGCAGGATGCCGAGAT                              |

---

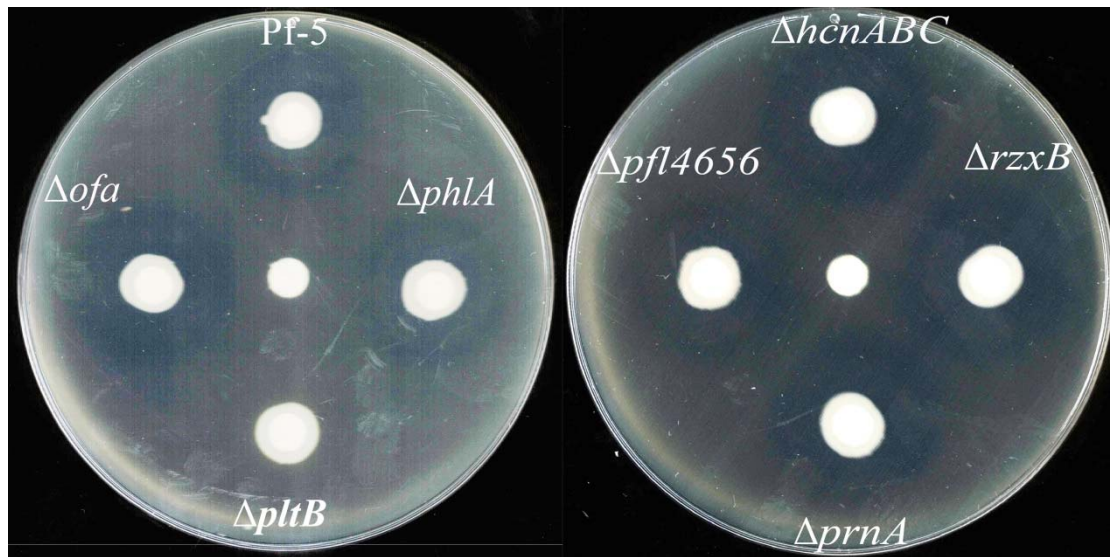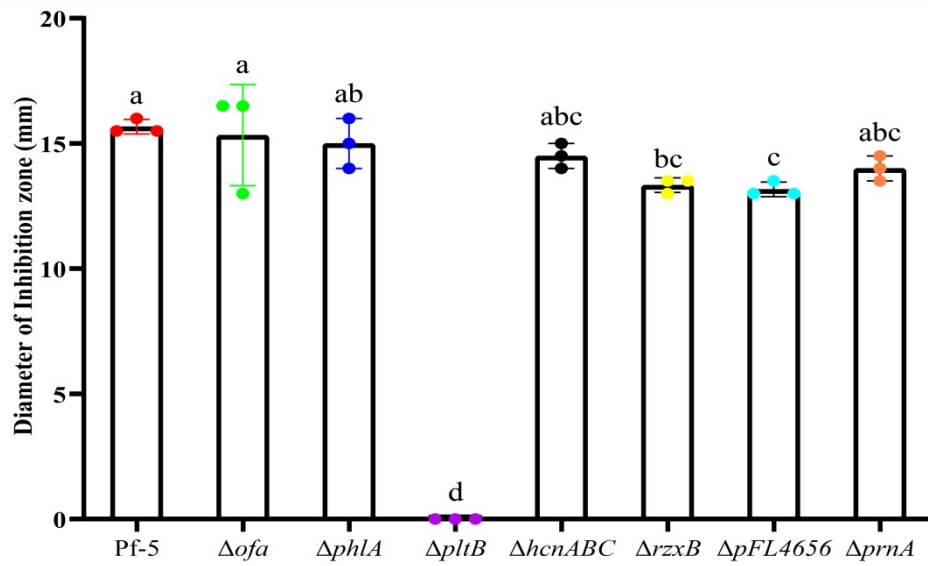

Figure S1 The antibacterial activity detection of Pf-5 and its mutants. The graph data show the average diameter (mm)  $\pm$  standard deviation (SD) of three replicates. Different letters represent statistically significant differences according to the one-way ANOVA test ( $P < 0.05$ ).
